# Supplementary material for: Hybrid hydrogels derived from renewable resources as a smart stimuli responsive soft material for drug delivery applications
Source: Royal Society of Chemistry journal article supplement (doi:10.1039/d1ra08447j), 2022-01-01
Supplement: d1ra08447j1.pdf [file d1ra08447j1.pdf]

## Hybrid Hydrogels Derived from Renewable Resources as a Smart Stimuli Responsive Soft Material for Drug Delivery Applications

Vandana Singh,<sup>a</sup> Yadavali Siva Prasad,<sup>a,d</sup> Arun Kumar Rachamalla,<sup>c</sup> Vara Prasad Rebaka,<sup>c</sup> Tohira Banoo,<sup>c</sup> C. Uma Maheswari,<sup>a</sup> Vellaisamy Sridharan,<sup>b</sup> Krishnamoorthy Lalitha,<sup>\*a</sup> Subbiah Nagarajan,<sup>\*a,c</sup>

a. School of Chemical and Biotechnology, SASTRA Deemed University, Thanjavur – 613401, Tamil Nadu, India.

b. Department of Chemistry and Chemical Sciences, Central University of Jammu, Rahya-Suchani (Bagla), District-Samba, Jammu-181143, J&K, India

c. Department of Chemistry, National Institute of Technology Warangal, Warangal -506004, Telangana, India.

d. Department of Biomedical Engineering, Saveetha School of Engineering, Saveetha Nagar, Thandalam, Tamil Nadu, India

---

---

### Table of Contents

|                                                                                                                                 |   |
|---------------------------------------------------------------------------------------------------------------------------------|---|
| 1. <b>Figure S1.</b> <sup>1</sup> H NMR of compound <b>6a</b> in CDCl <sub>3</sub> .....                                        | 3 |
| 2. <b>Figure S2.</b> <sup>13</sup> C NMR of compound <b>6a</b> in CDCl <sub>3</sub> .....                                       | 3 |
| 3. <b>Figure S3.</b> <sup>1</sup> H NMR of compound <b>6b</b> in CDCl <sub>3</sub> .....                                        | 4 |
| 4. <b>Figure S4.</b> <sup>13</sup> C NMR of compound <b>6b</b> in CDCl <sub>3</sub> .....                                       | 4 |
| 5. <b>Figure S5.</b> <sup>1</sup> H NMR of compound <b>7a</b> in CDCl <sub>3</sub> .....                                        | 5 |
| 6. <b>Figure S6.</b> <sup>13</sup> C NMR of compound <b>7a</b> in CDCl <sub>3</sub> .....                                       | 5 |
| 7. <b>Figure S7.</b> <sup>1</sup> H NMR of compound <b>7b</b> in CDCl <sub>3</sub> .....                                        | 6 |
| 8. <b>Figure S8.</b> <sup>13</sup> C NMR of compound <b>7b</b> in CDCl <sub>3</sub> .....                                       | 6 |
| 9. <b>Figure S9.</b> <sup>1</sup> H NMR of <i>t</i> -butyl (3,4-bis(benzyloxy)phenethyl)carbamate in CDCl <sub>3</sub> .....    | 7 |
| 10. <b>Figure S10.</b> <sup>13</sup> C NMR of <i>t</i> -butyl (3,4-bis(benzyloxy)phenethyl)carbamate in CDCl <sub>3</sub> ..... | 7 |

|                                                                                                                                                        |    |
|--------------------------------------------------------------------------------------------------------------------------------------------------------|----|
| 11. <b>Figure S11.</b> $^1\text{H}$ NMR of 2-(3,4-Bis-benzyloxy-phenyl)-ethylamine in $\text{CDCl}_3$ .....                                            | 8  |
| 12. <b>Figure S12.</b> $^{13}\text{C}$ NMR of 2-(3,4-Bis-benzyloxy-phenyl)-ethylamine in $\text{CDCl}_3$ .....                                         | 8  |
| 13. <b>Figure S13.</b> $^1\text{H}$ NMR of <i>N</i> -(3,4-bis(benzyloxy)phenethyl)-2-(3-pentadecylphenoxy)acetamide in $\text{CDCl}_3$ .....           | 9  |
| 14. <b>Figure S14.</b> $^{13}\text{C}$ NMR of <i>N</i> -(3,4-bis(benzyloxy)phenethyl)-2-(3-pentadecylphenoxy)acetamide in $\text{CDCl}_3$ .....        | 9  |
| 15. <b>Figure S15.</b> $^1\text{H}$ NMR of <i>N</i> -(3,4-bis(benzyloxy)phenethyl)-2-(3-pentadec8-en-1-ylphenoxy)acetamide in $\text{CDCl}_3$ .....    | 10 |
| 16. <b>Figure S16.</b> $^{13}\text{C}$ NMR of <i>N</i> -(3,4-bis(benzyloxy)phenethyl)-2-(3-pentadec8-en-1-ylphenoxy)acetamide in $\text{CDCl}_3$ ..... | 10 |
| 17. <b>Figure S17.</b> $^1\text{H}$ NMR of compound <b>8a</b> in $\text{CDCl}_3$ .....                                                                 | 11 |
| 18. <b>Figure S18.</b> $^{13}\text{C}$ NMR of compound <b>8a</b> in $\text{CDCl}_3$ .....                                                              | 11 |
| 19. <b>Figure S19.</b> $^1\text{H}$ NMR of compound <b>8b</b> in $\text{CDCl}_3$ .....                                                                 | 12 |
| 20. <b>Figure S20.</b> $^{13}\text{C}$ NMR of compound <b>8b</b> in $\text{CDCl}_3$ .....                                                              | 12 |
| 21. <b>Figure S21</b> Mass spectra of compound <b>6a</b> methanol.....                                                                                 | 13 |
| 22. <b>Figure S22</b> Mass spectra of compound <b>6b</b> methanol .....                                                                                | 13 |
| 23. <b>Figure S23</b> Mass spectra of compound <b>7a</b> methanol.....                                                                                 | 14 |
| 24. <b>Figure S24</b> Mass spectra of compound <b>8a</b> methanol.....                                                                                 | 14 |
| 25. <b>Figure S25</b> Mass spectra of compound <b>8b</b> methanol .....                                                                                | 15 |
| 26. <b>Table S1</b> Optimization of reaction condition for the synthesis of <b>7a,b</b> .....                                                          | 16 |
| 27. <b>Figure S26</b> FESEM image of the gel formed by <b>6a</b> .....                                                                                 | 17 |
| 28. <b>Figure S27</b> Size distribution intensity plot of <b>7a</b> .....                                                                              | 17 |

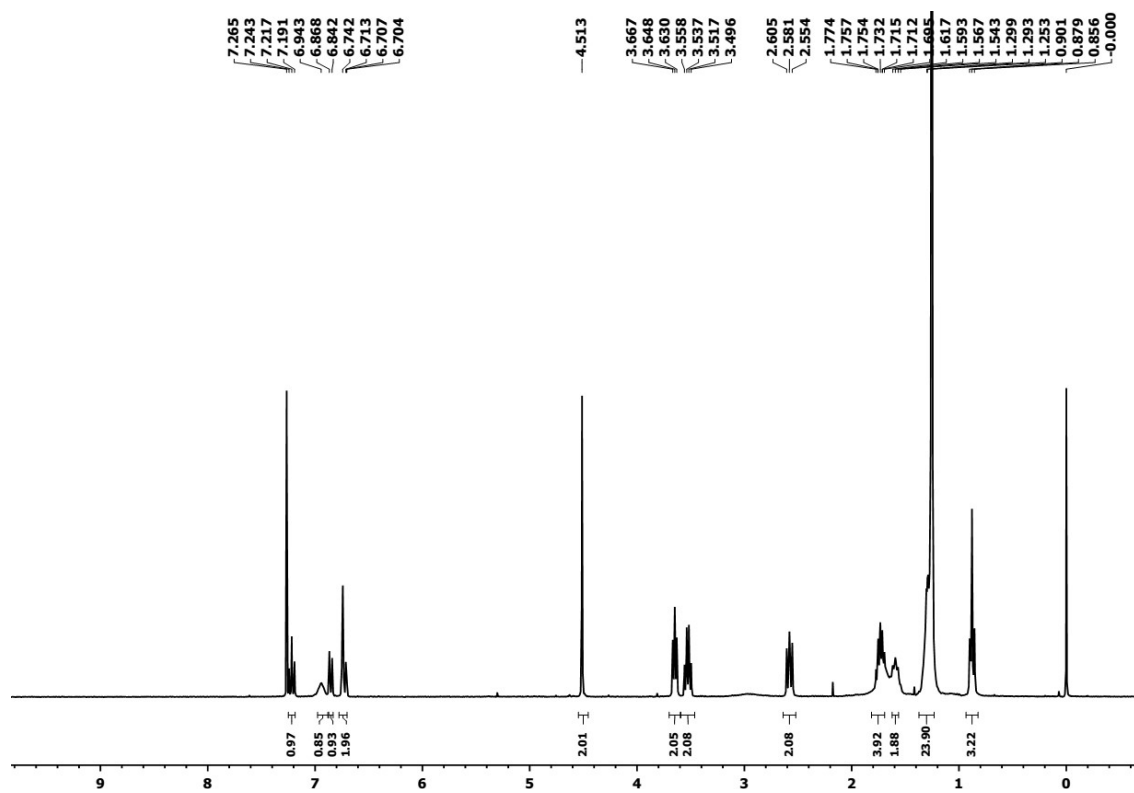

Figure S1.  $^1\text{H}$  NMR of compound **6a** in  $\text{CDCl}_3$

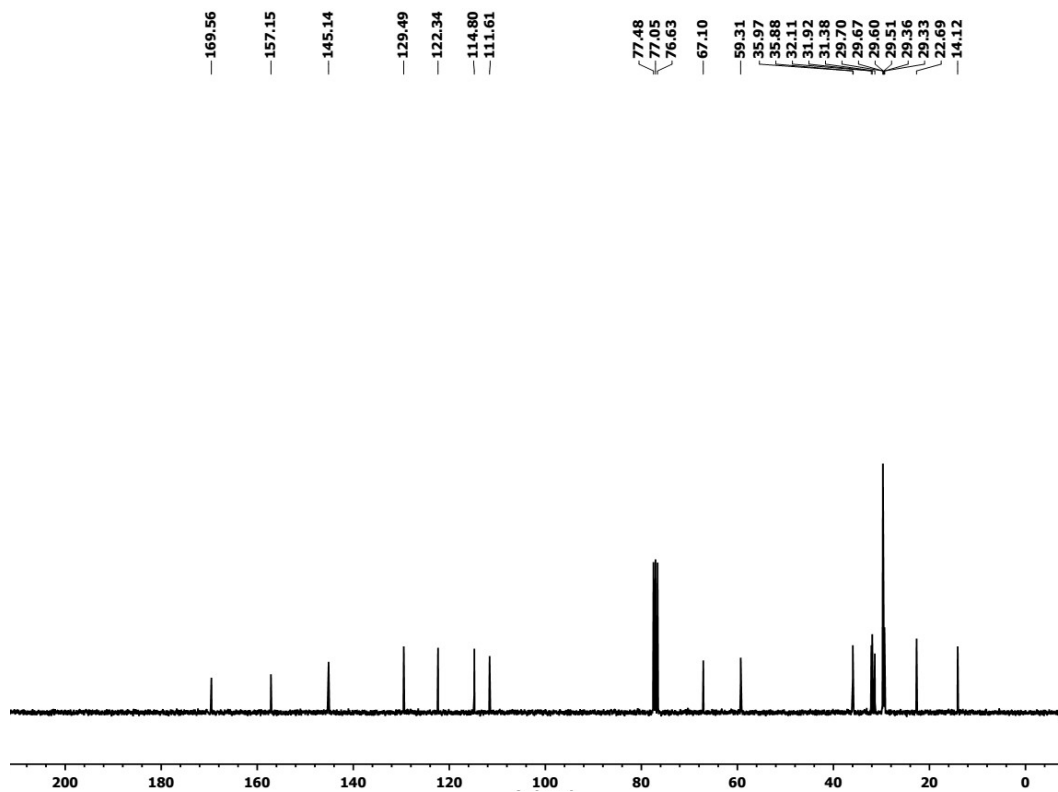

Figure S2.  $^{13}\text{C}$  NMR of compound **6a** in  $\text{CDCl}_3$

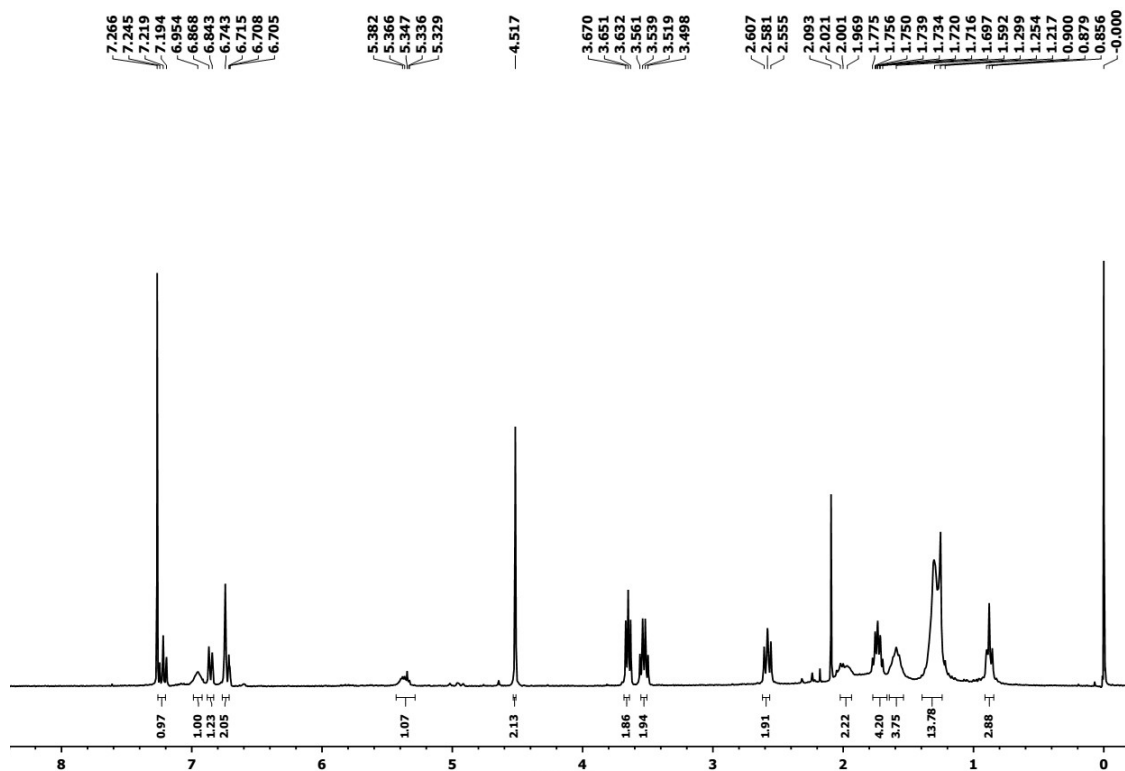

Figure S3.  $^1\text{H}$  NMR of compound **6b** in  $\text{CDCl}_3$

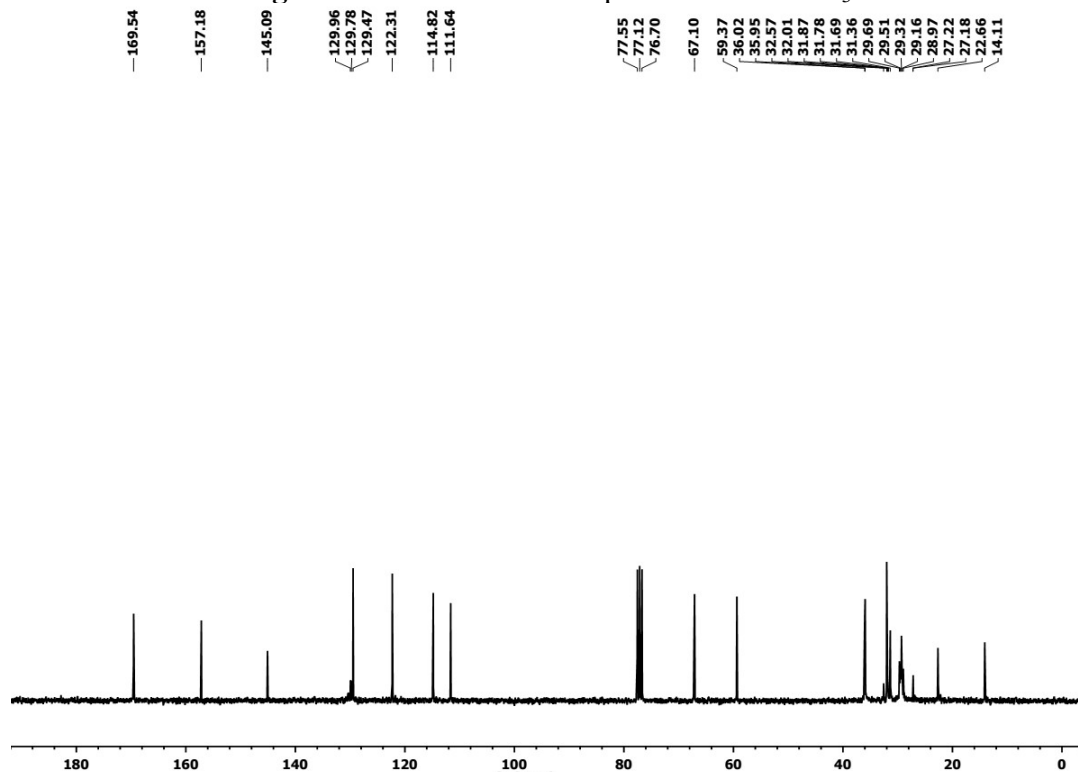

Figure S4.  $^{13}\text{C}$  NMR of compound **6b** in  $\text{CDCl}_3$

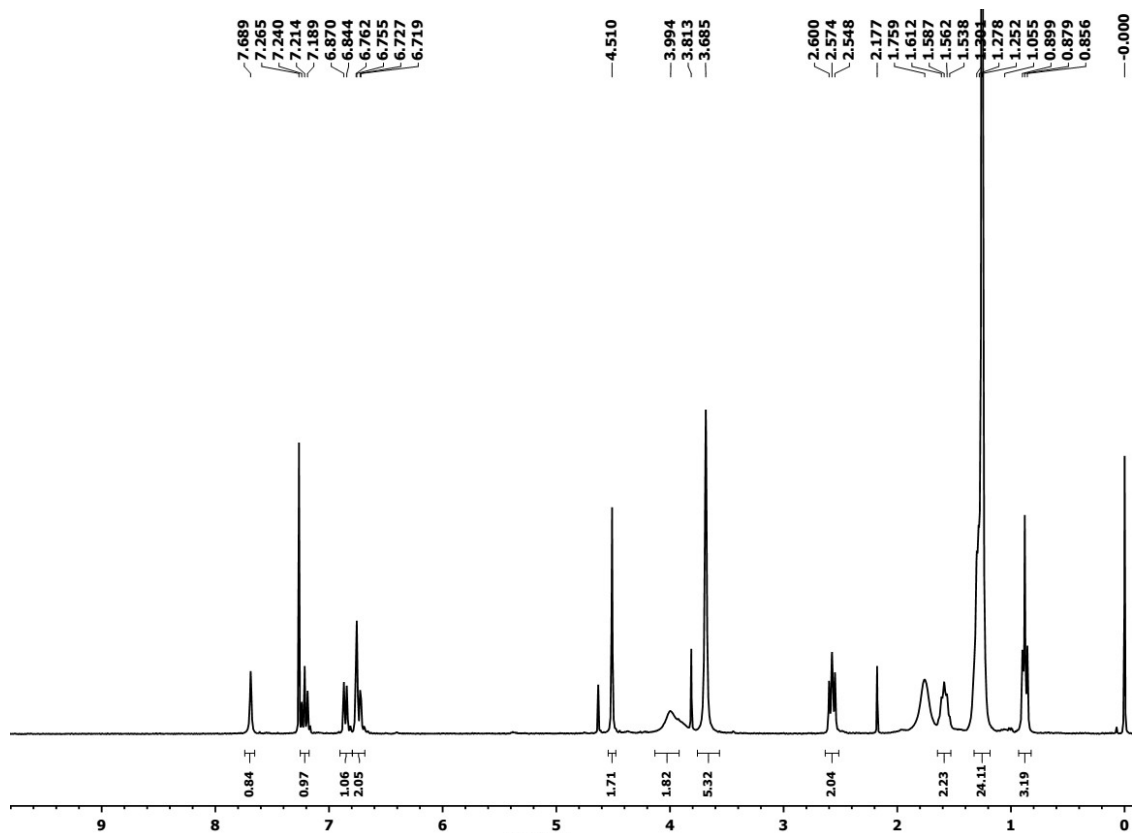

Figure S5.  $^1\text{H}$  NMR of compound **7a** in  $\text{CDCl}_3$

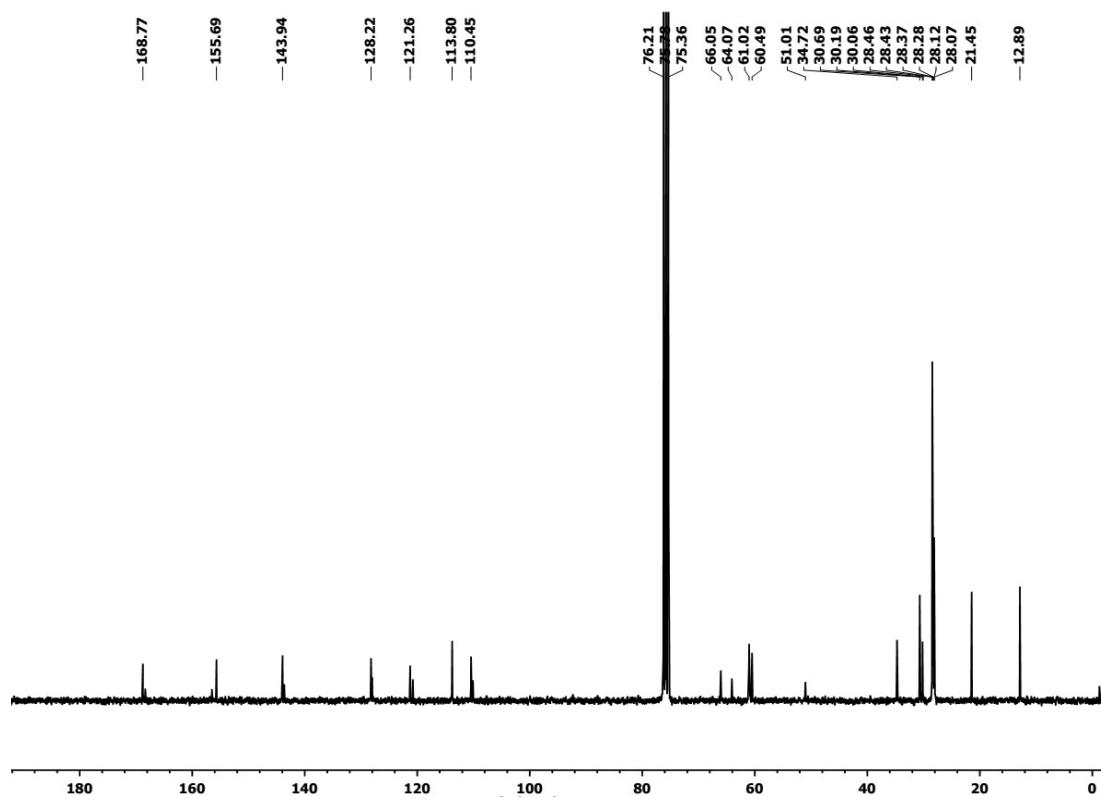

Figure S6.  $^{13}\text{C}$  NMR of compound **7a** in  $\text{CDCl}_3$

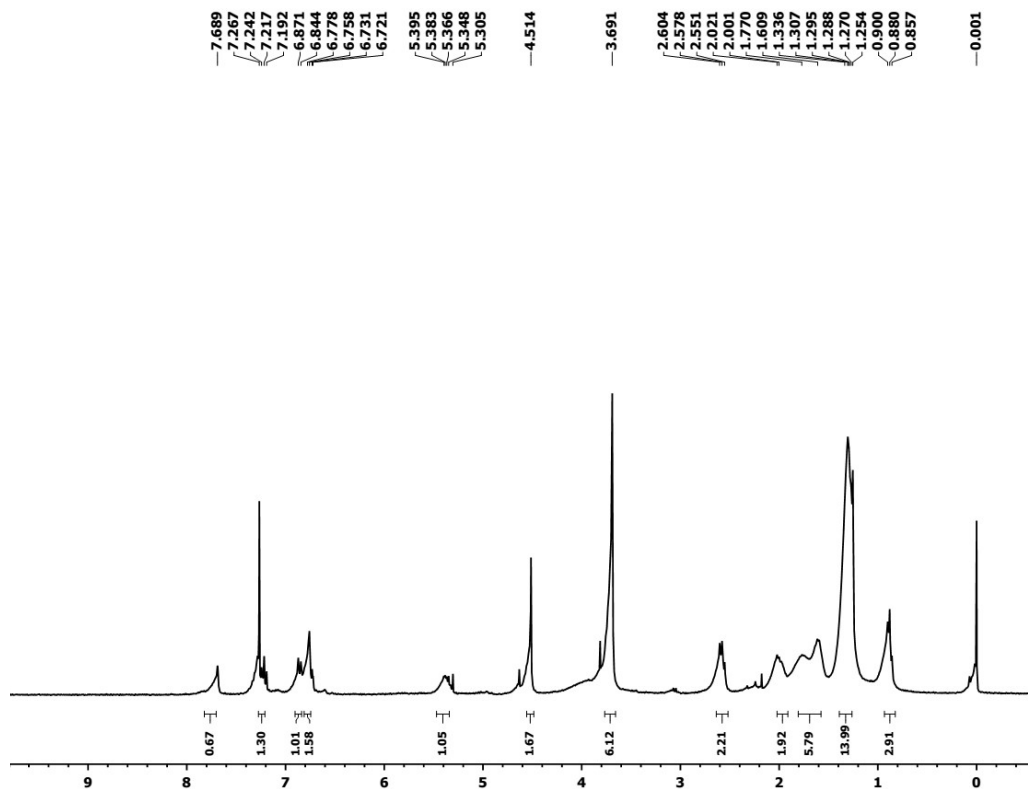

Figure S7.  $^1\text{H}$  NMR of compound **7b** in  $\text{CDCl}_3$

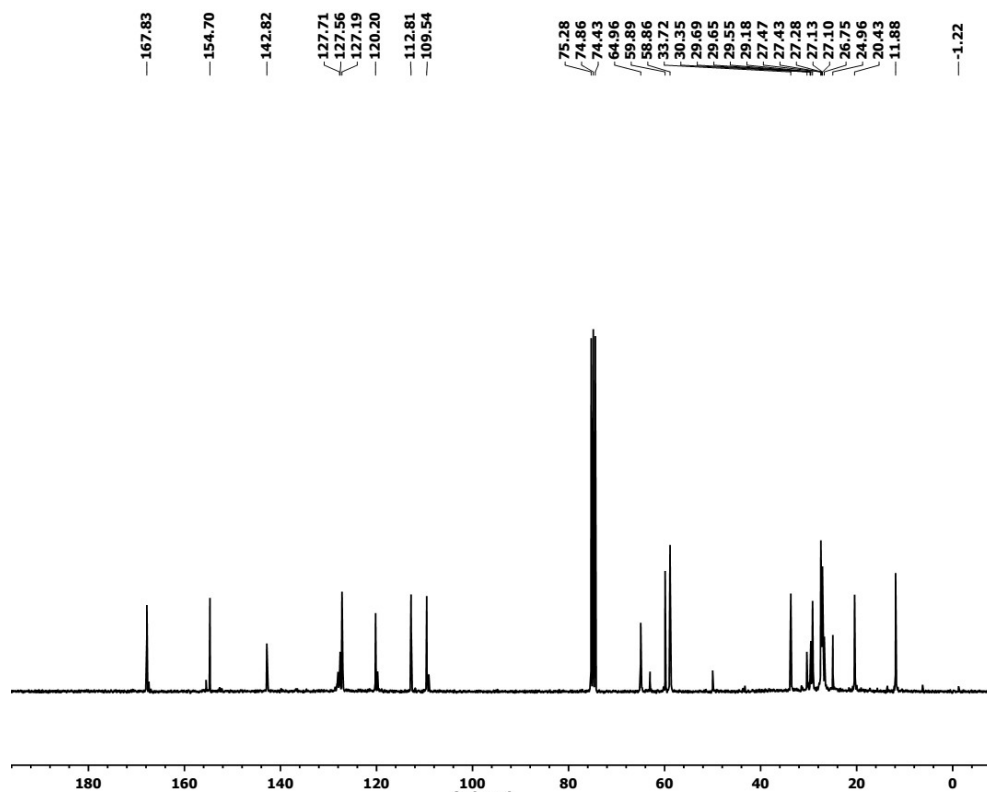

Figure S8.  $^{13}\text{C}$  NMR of compound **7b** in  $\text{CDCl}_3$

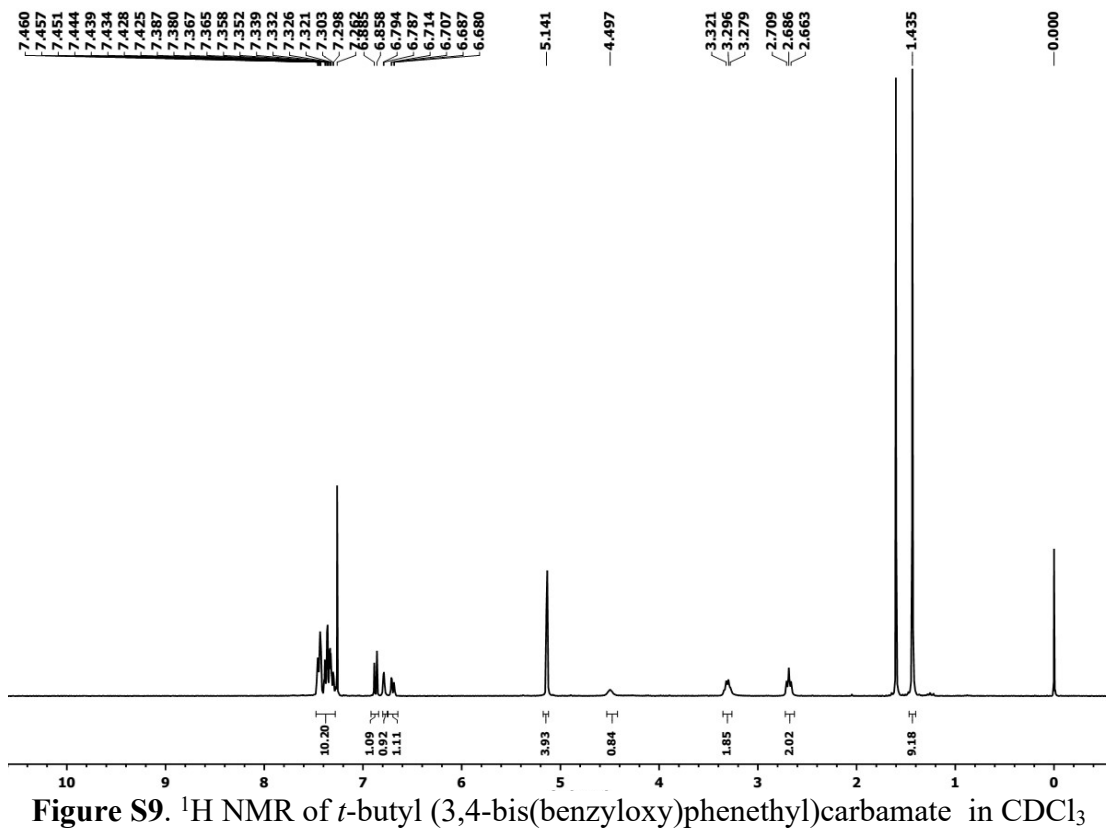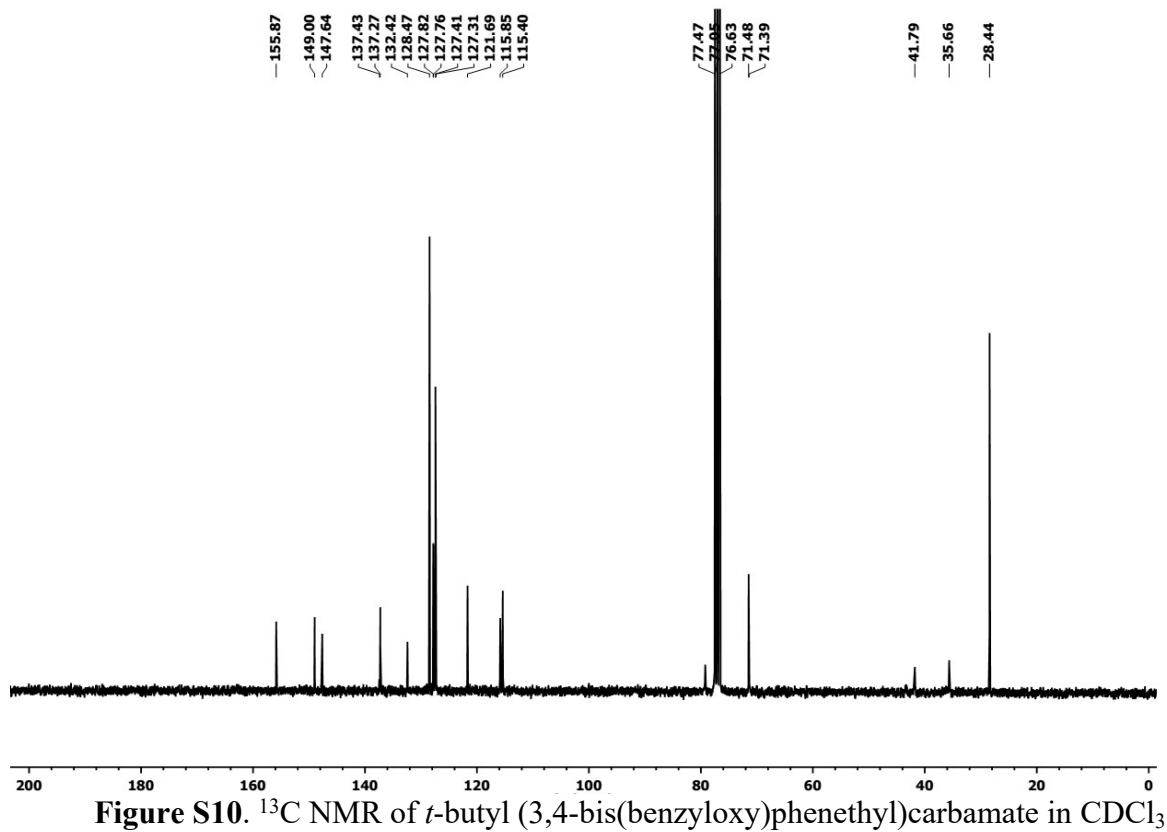

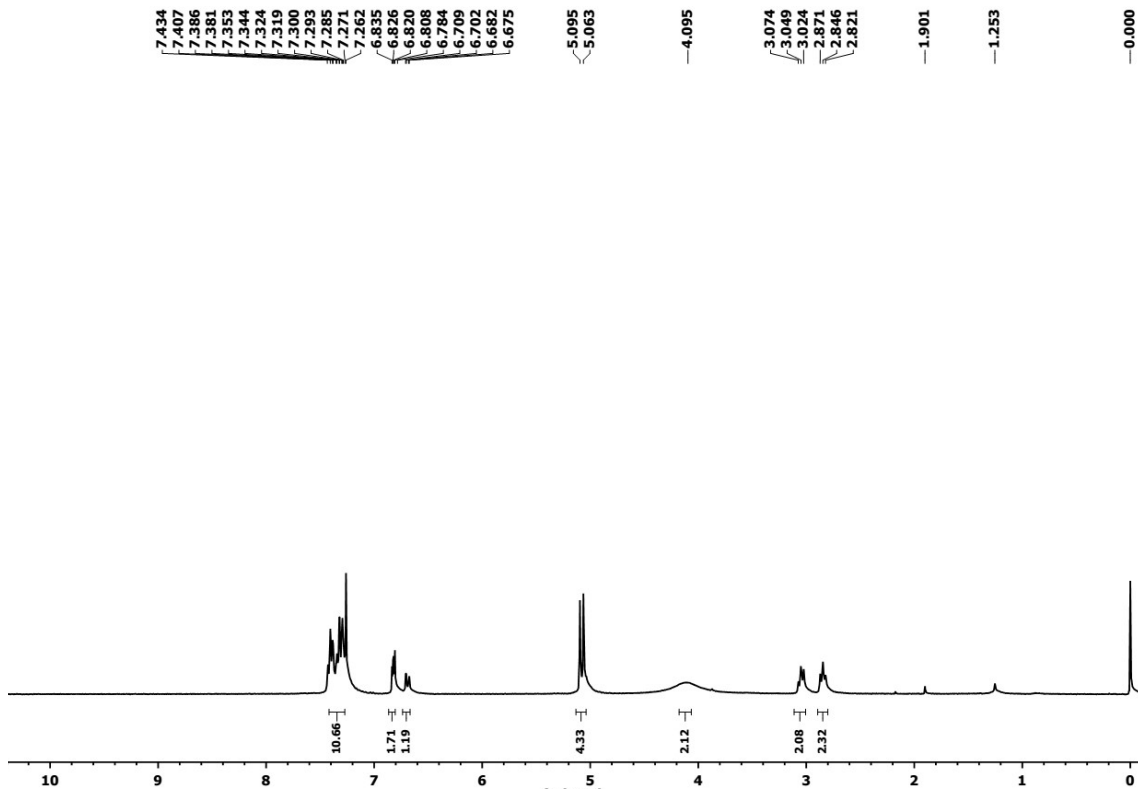

Figure S11. <sup>1</sup>H NMR of 2-(3,4-Bis-benzyloxy-phenyl)-ethylamine in CDCl<sub>3</sub>

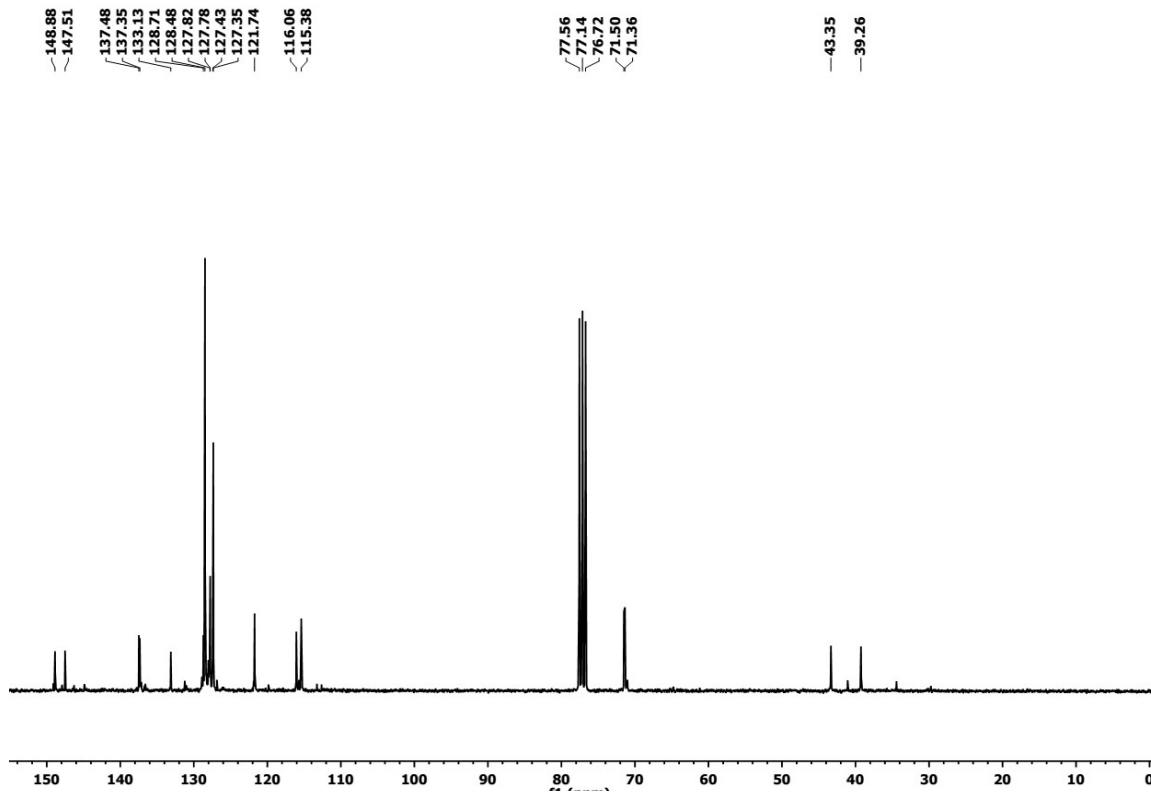

Figure S12. <sup>13</sup>C NMR of 2-(3,4-Bis-benzyloxy-phenyl)-ethylamine in CDCl<sub>3</sub>



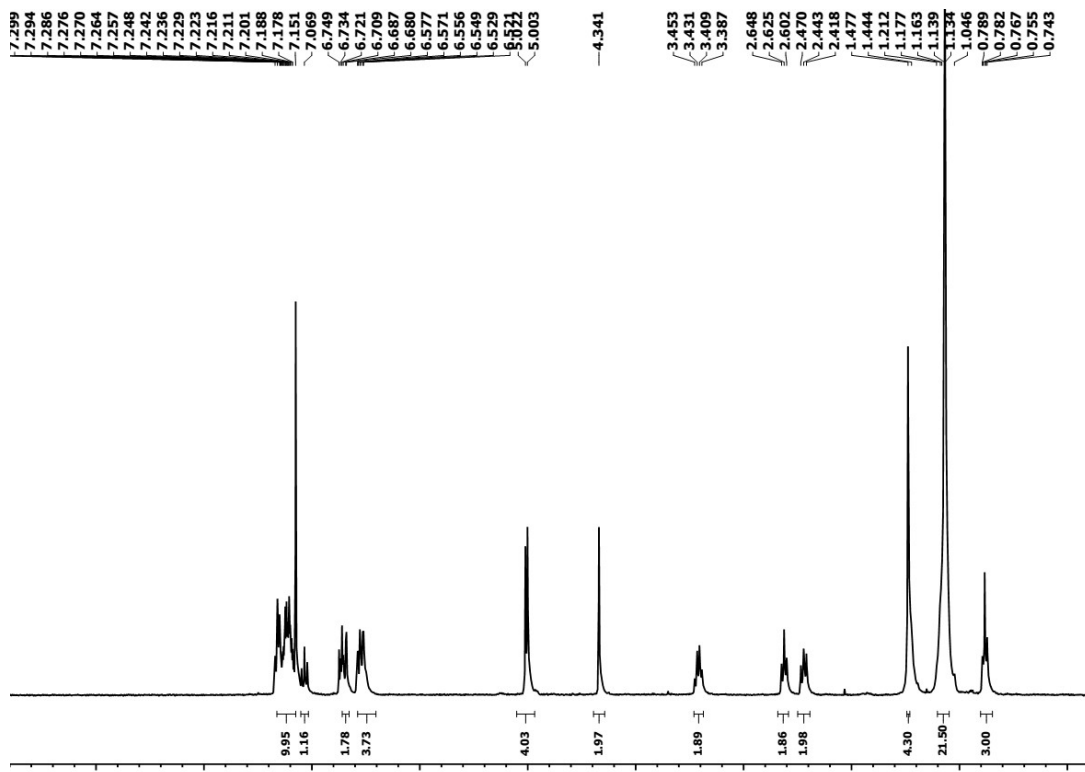

Figure S13.  $^1\text{H}$  NMR of *N*-(3,4-bis(benzyloxy)phenethyl)-2-(3-pentadecylphenoxy)acetamide in  $\text{CDCl}_3$

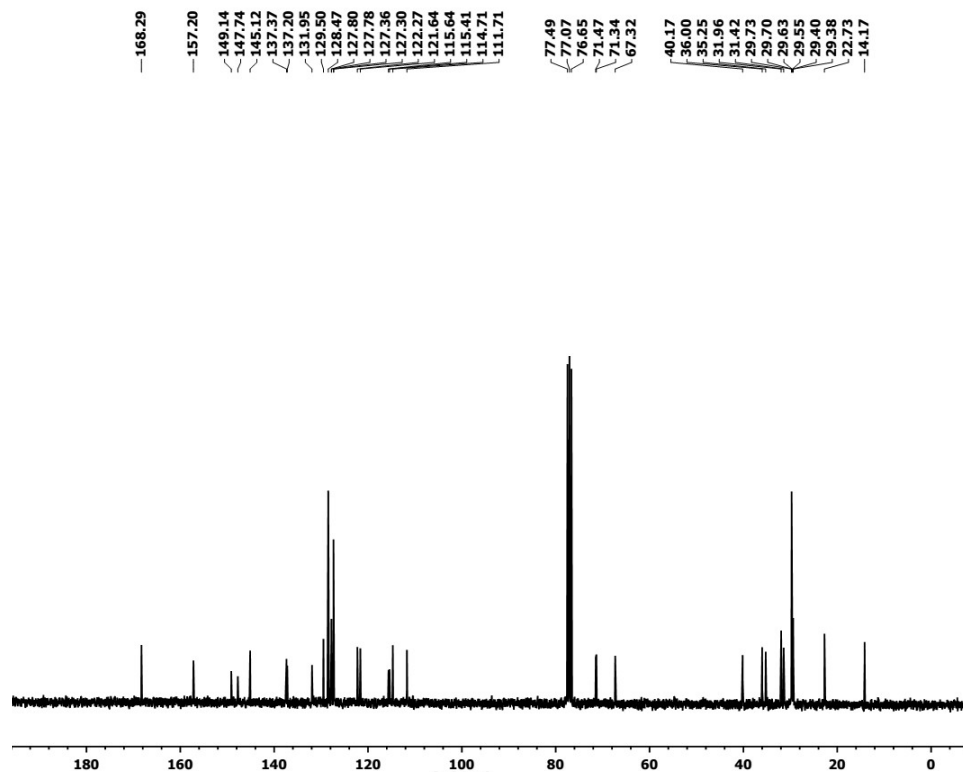

Figure S14.  $^{13}\text{C}$  NMR of *N*-(3,4-bis(benzyloxy)phenethyl)-2-(3-pentadecylphenoxy)acetamide in  $\text{CDCl}_3$

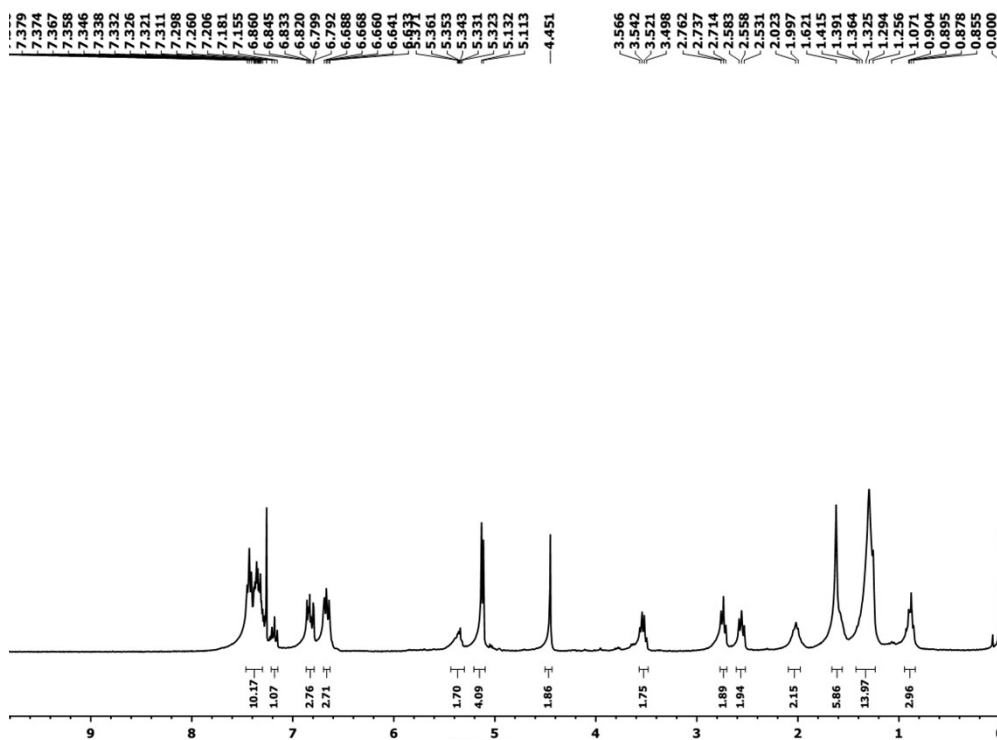

Figure S15.  $^1\text{H}$  NMR of *N*-(3,4-bis(benzyloxy)phenethyl)-2-(3-pentadec8-en-1-ylphenoxy)acetamide in  $\text{CDCl}_3$

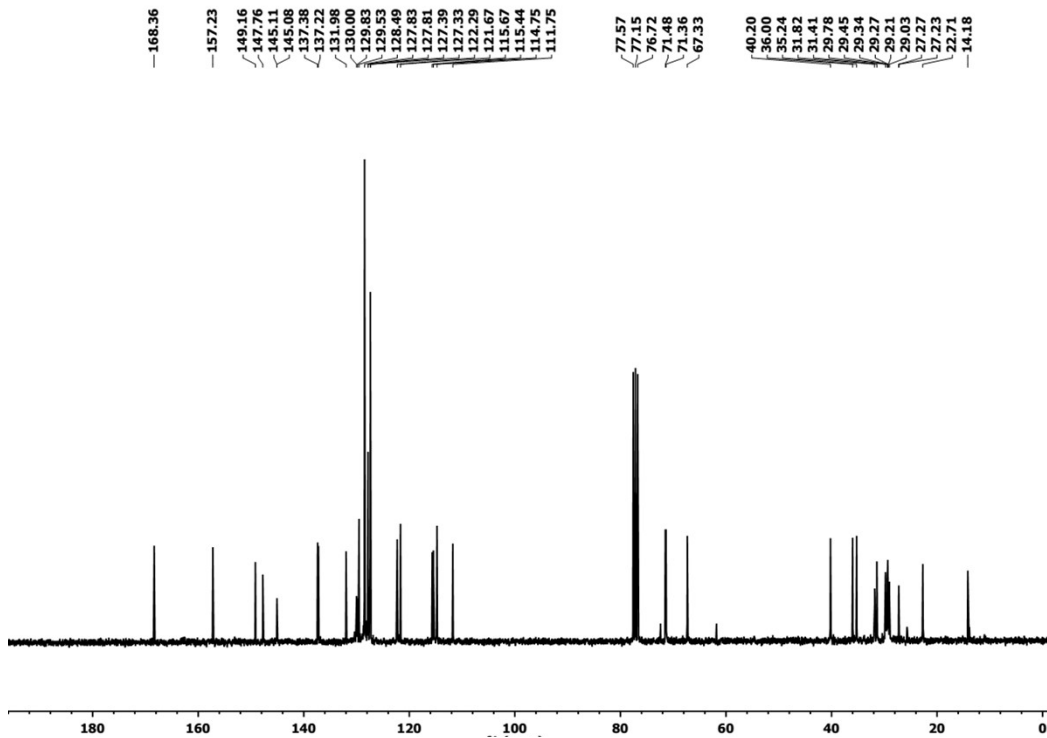

Figure S16.  $^{13}\text{C}$  NMR of *N*-(3,4-bis(benzyloxy)phenethyl)-2-(3-pentadec8-en-1-ylphenoxy)acetamide in  $\text{CDCl}_3$

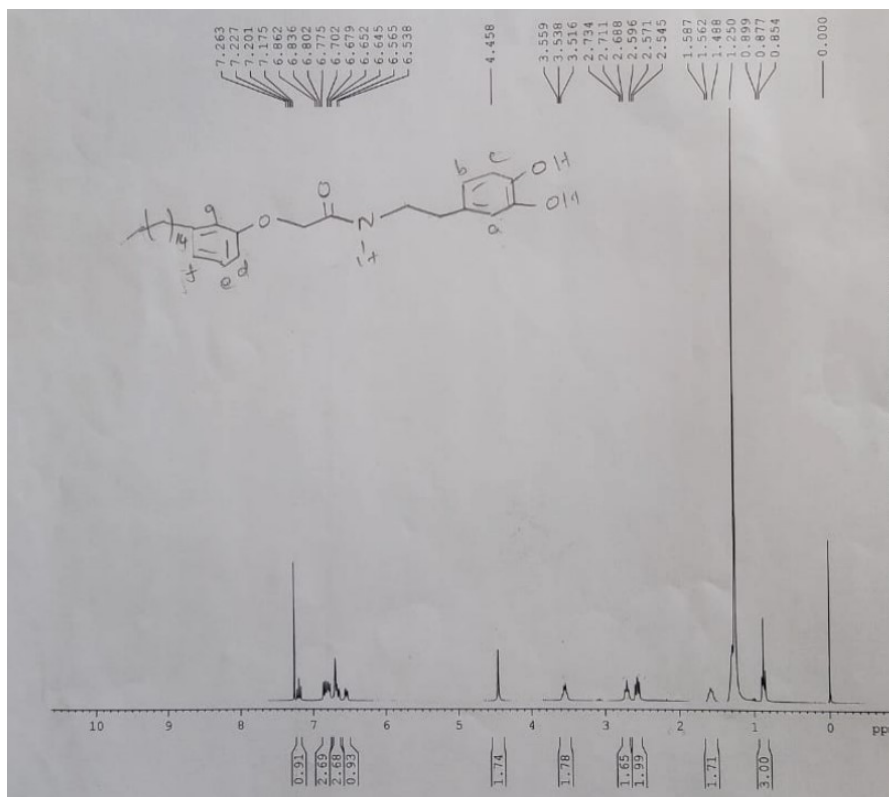

Figure S17. <sup>1</sup>H NMR of compound **8a** in CDCl<sub>3</sub>

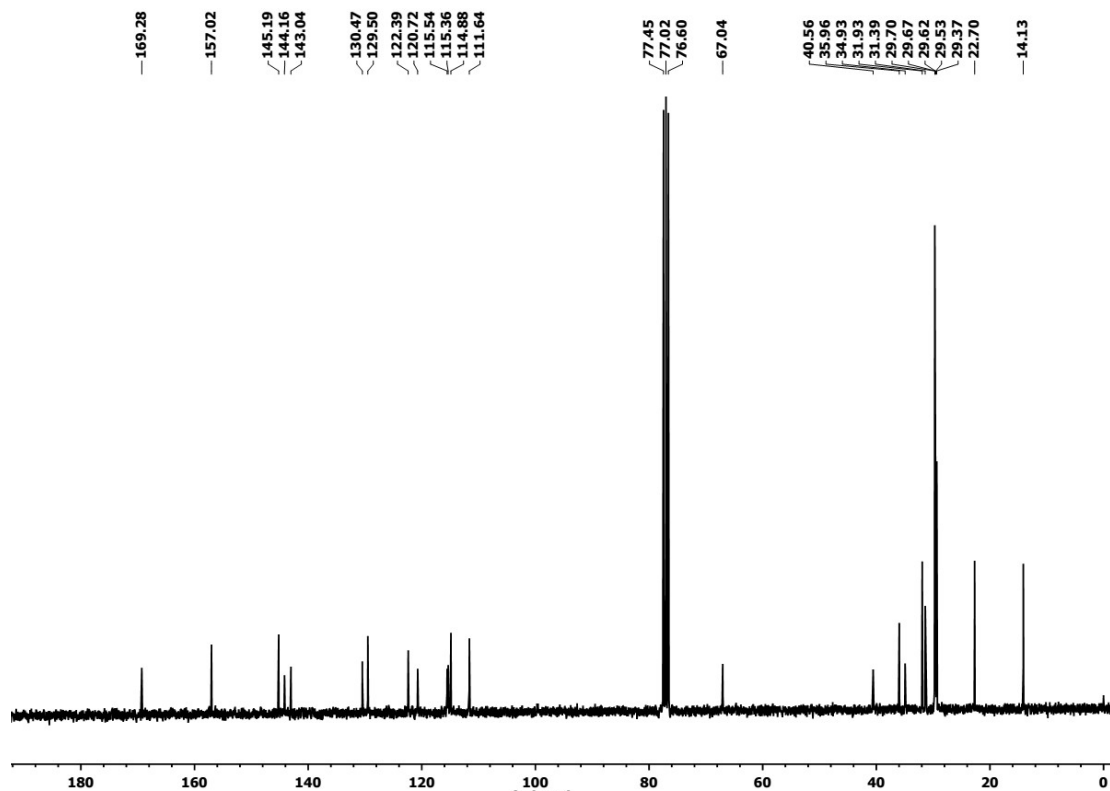

Figure S18. <sup>13</sup>C NMR of compound **8a** in CDCl<sub>3</sub>

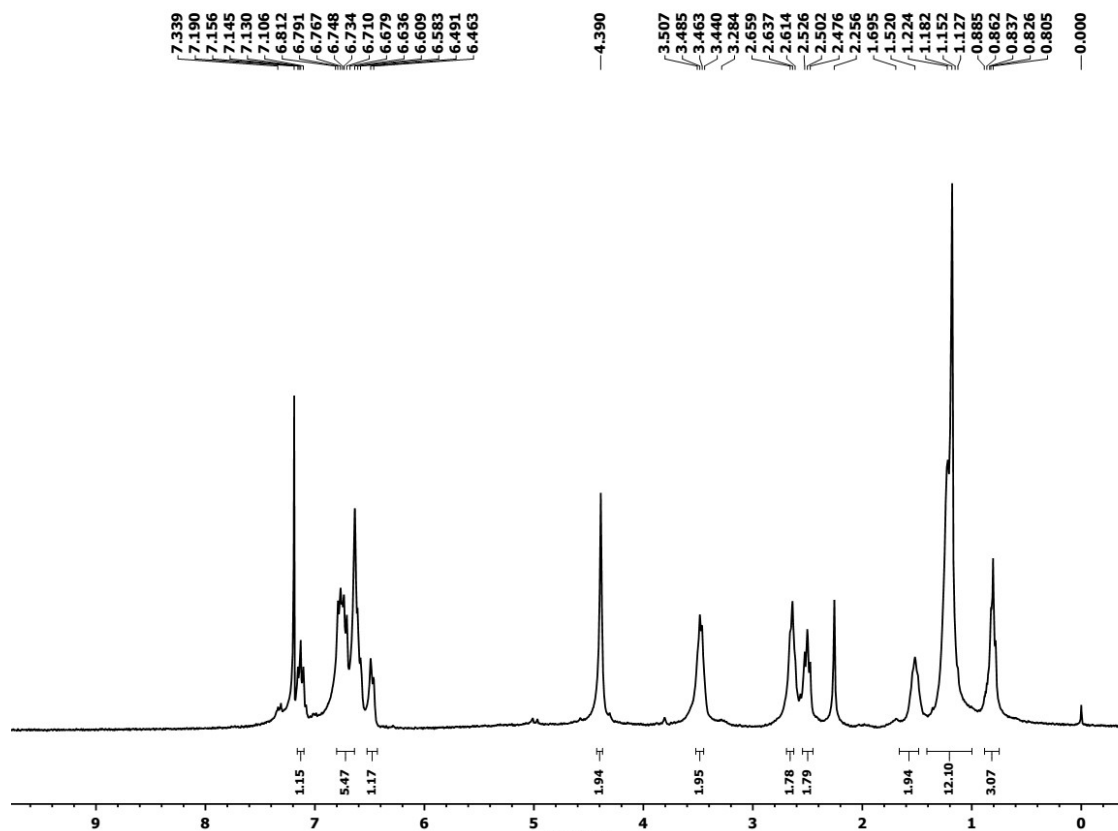

Figure S19.  $^1\text{H}$  NMR of compound **8b** in  $\text{CDCl}_3$

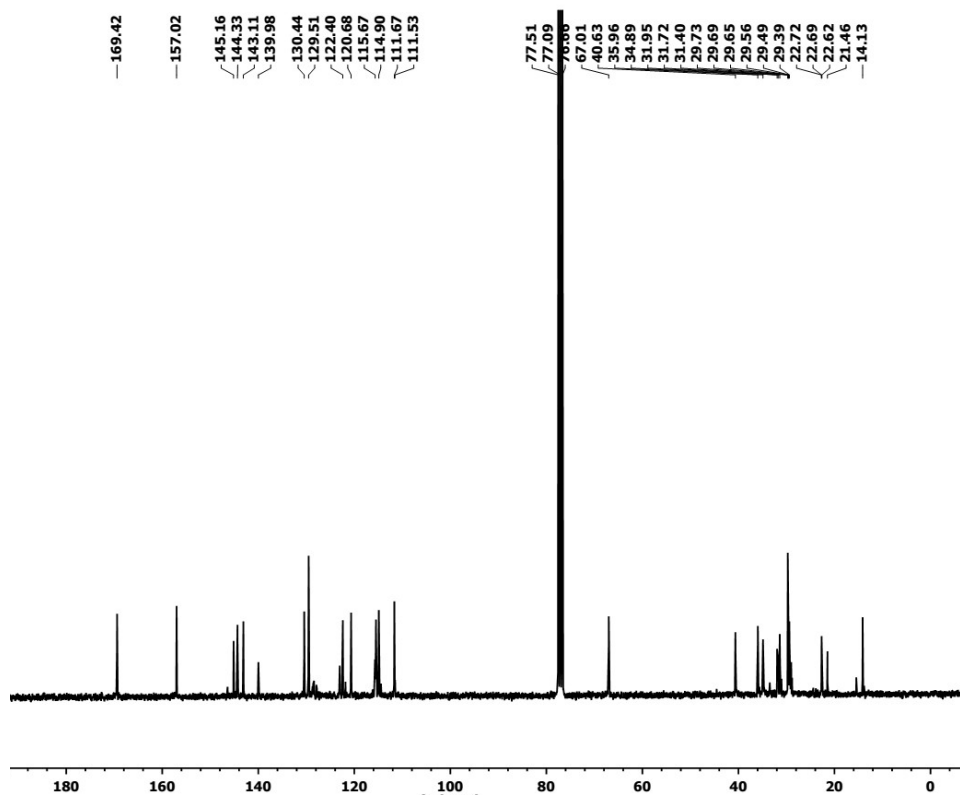

Figure S20.  $^{13}\text{C}$  NMR of compound **8b** in  $\text{CDCl}_3$

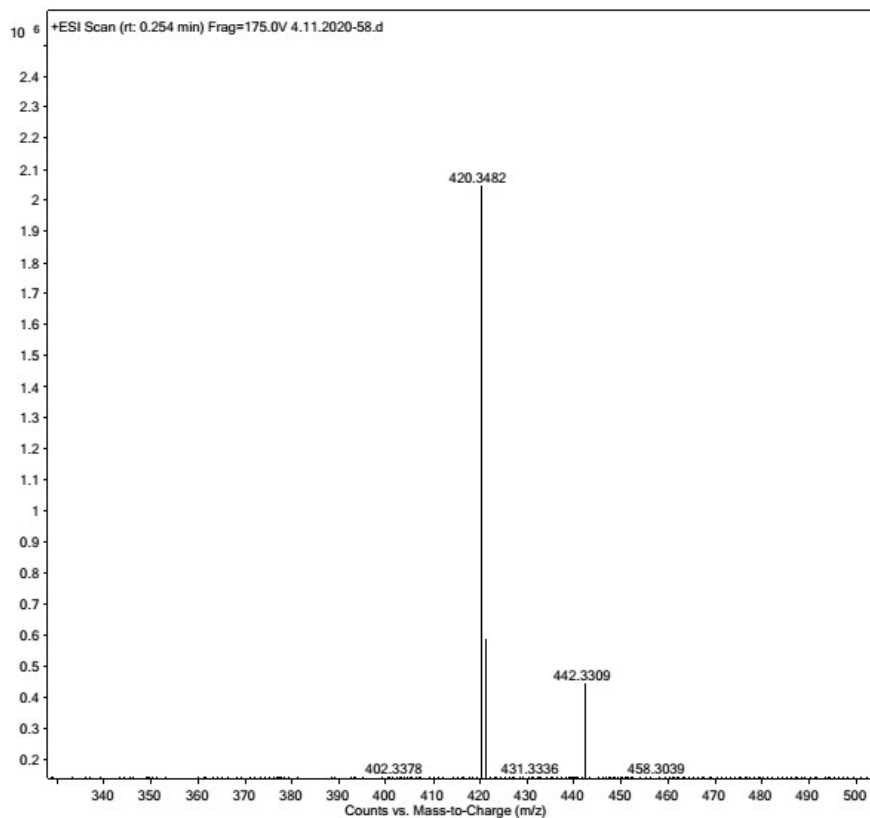

**Figure S21.** Mass spectra of compound **6a** in methanol

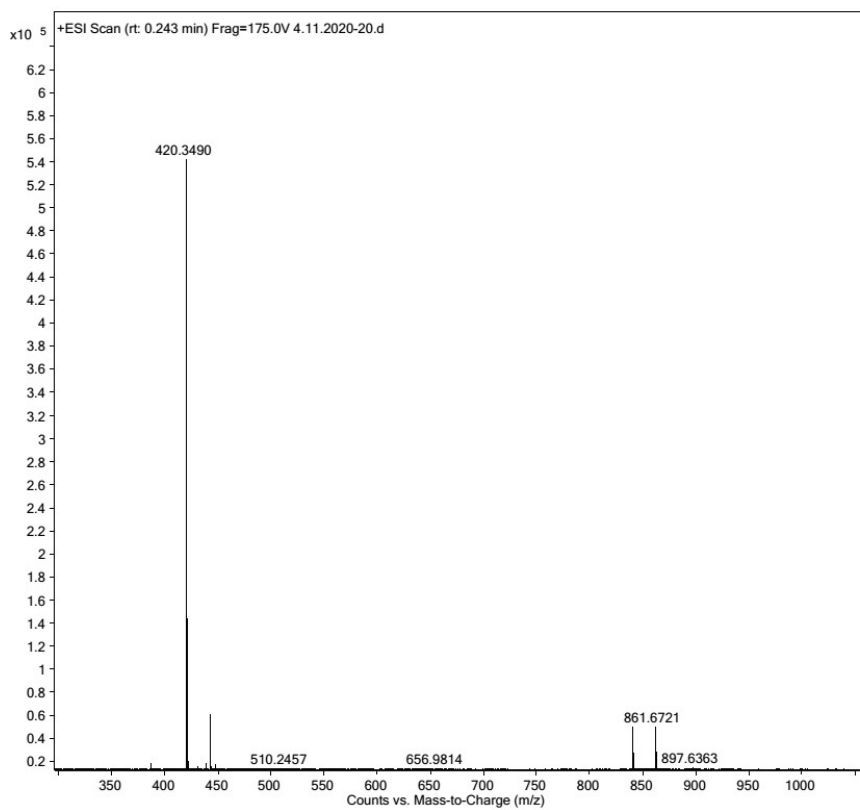

**Figure S22.** Mass spectra of compound **6b** in methanol

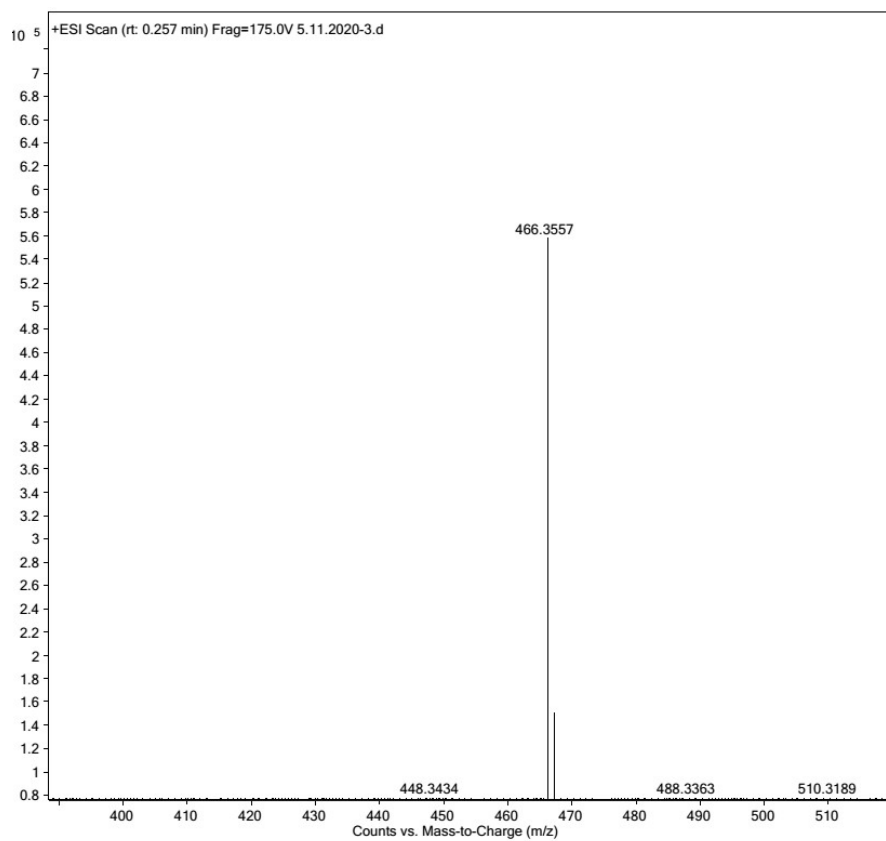

Figure S23. Mass spectra of compound **7a** in methanol

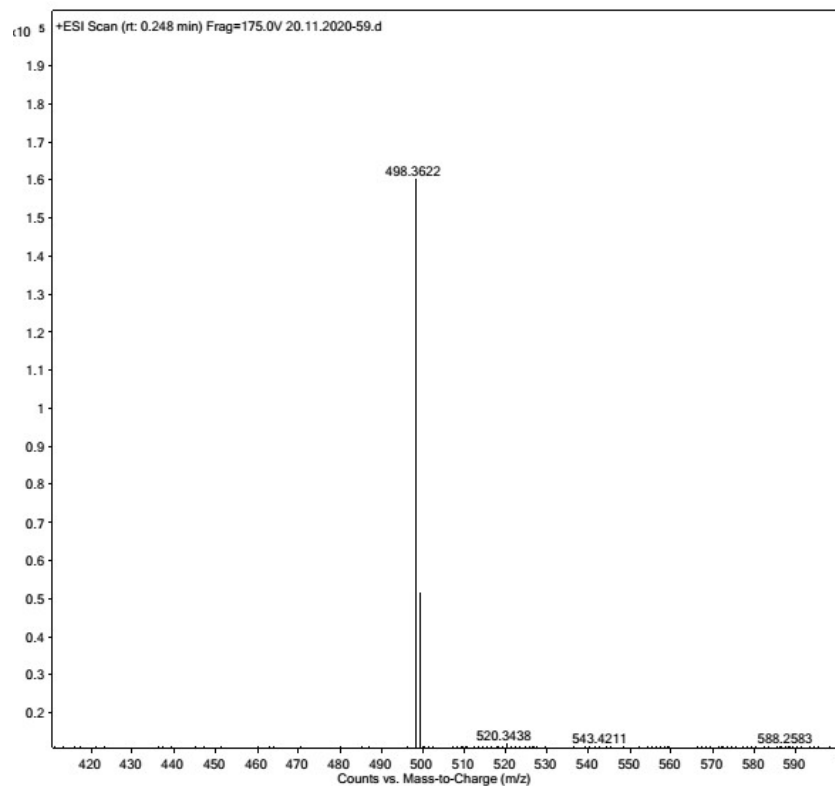

Figure S24. Mass spectra of compound **8a** in methanol

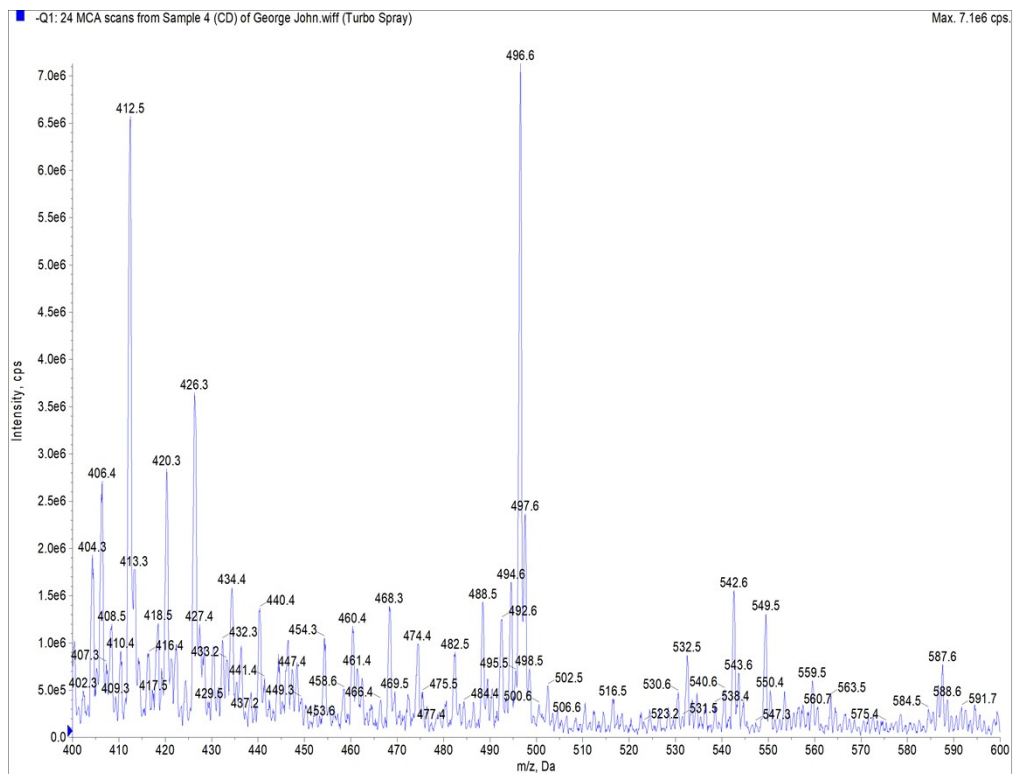

Figure S25. Mass spectra of compound **8b** in methanol

**Table S1.** Optimization of reaction conditions for the synthesis of *N*-(1,3-dihydroxy-2-(hydroxymethyl)propan-2-yl)-2-(3-alkyl phenoxy)acetamides **7a,b**

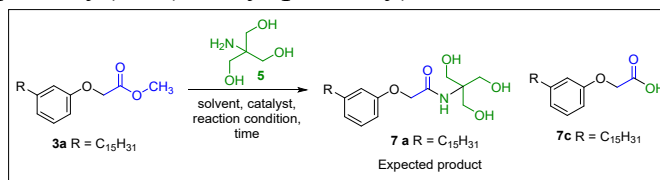

| Entry | Solvent          | Catalyst                       | Reaction Condition | Reaction Time (h) | Yield (%) <sup>*</sup>        |
|-------|------------------|--------------------------------|--------------------|-------------------|-------------------------------|
| 1     | MeOH             | -                              | RT                 | 2                 | NR                            |
| 2     | MeOH             | -                              | Reflux             | 6                 | NR                            |
| 3     | DMSO             | -                              | Reflux             | 6                 | NR                            |
| 4     | MeOH             | K <sub>2</sub> CO <sub>3</sub> | RT                 | 2                 | NR                            |
| 5     | EtOH             | K <sub>2</sub> CO <sub>3</sub> | RT                 | 2                 | NR                            |
| 6     | THF              | K <sub>2</sub> CO <sub>3</sub> | RT                 | 2                 | NR                            |
| 7     | Anhydrous DMSO   | K <sub>2</sub> CO <sub>3</sub> | RT                 | 2                 | NR                            |
| 8     | MeOH             | K <sub>2</sub> CO <sub>3</sub> | Reflux             | 6                 | <b>7c</b> formed              |
| 9     | Anhydrous DMSO   | K <sub>2</sub> CO <sub>3</sub> | reflux             | 6                 | <b>7c</b> formed              |
| 10    | DCM              | K <sub>2</sub> CO <sub>3</sub> | RT                 | 6-12              | NR                            |
| 11    | DCM              | Et <sub>3</sub> N              | RT                 | 2                 | NR                            |
| 12    | MeOH             | Et <sub>3</sub> N              | RT                 | 2                 | < 10                          |
| 13    | MeOH             | Et <sub>3</sub> N              | RT                 | 6                 | 40                            |
| 14    | EtOH             | Et <sub>3</sub> N              | RT                 | 6                 | 20                            |
| 15    | THF              | Et <sub>3</sub> N              | RT                 | 6                 | NR                            |
| 16    | MeOH             | Et <sub>3</sub> N              | reflux             | 6                 | <b>7c</b> formed <sup>#</sup> |
| 17    | DCM + MeOH (9:1) | Et <sub>3</sub> N              | RT                 | 8                 | 30                            |
| 18    | DCM + MeOH (1:1) | Et <sub>3</sub> N              | RT                 | 12                | 72                            |



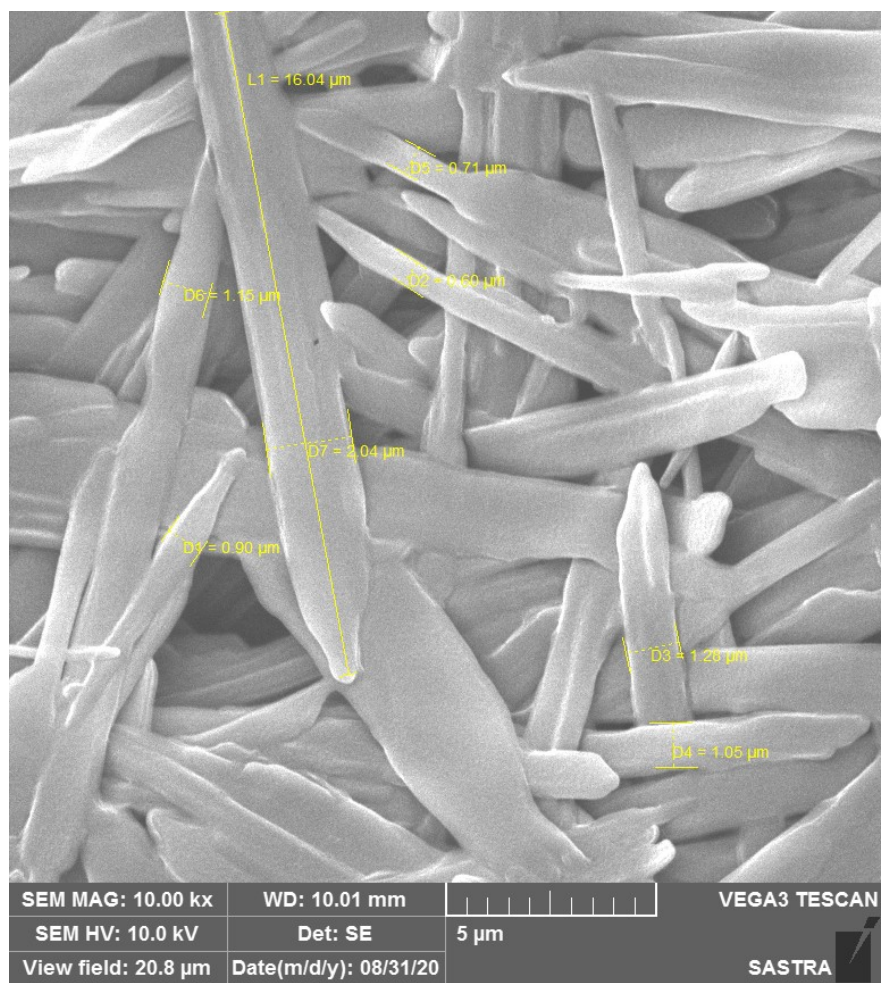

**Figure S26.** SEM image of hybrid hydrogel formed by **6a**

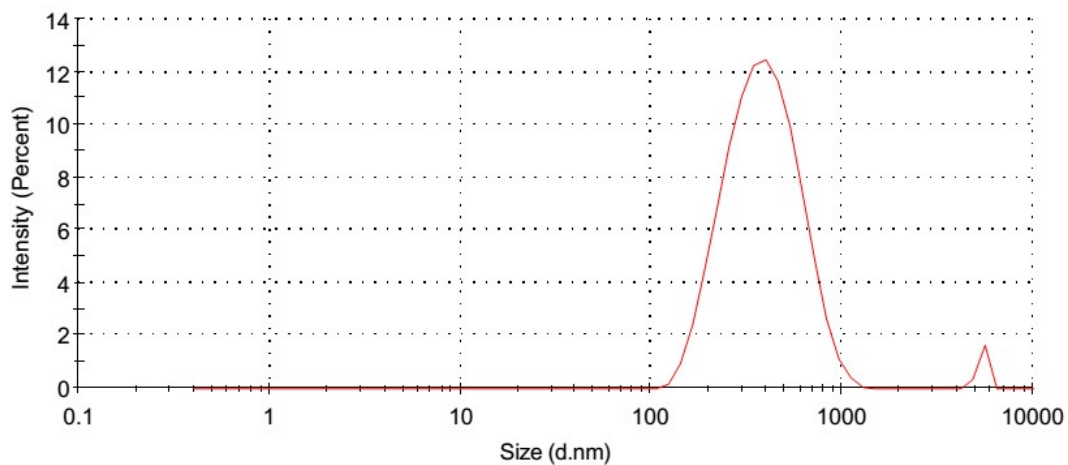

**Figure S27.** Size distribution intensity plot of **8a** in ethanol + H<sub>2</sub>O
